# Supplementary material
Source: ML conference proceedings conference paper supplement (https://openreview.net/forum?id=1quLRqyqVm)
Supplement: supplementary_material [file attachment]

# Supplementary Materials of Efficient Perceiving Local Details via Adaptive Spatial-Frequency Information Integration for Multi-focus Image Fusion

Anonymous Authors

We further selected the different regions from the same samples in our main paper for visual comparison, as shown in Figure 1 and Figure 2.

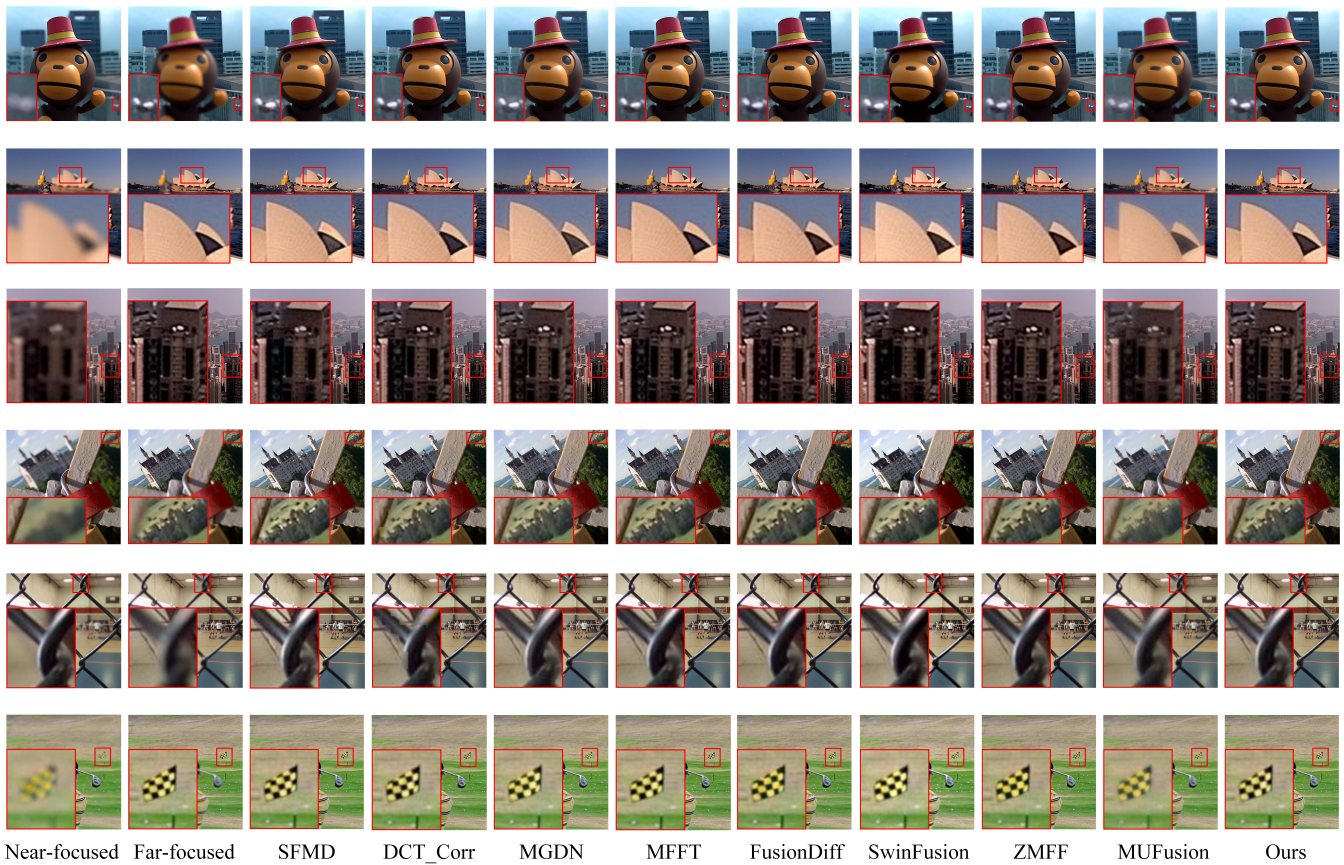

Figure 1: The visual comparisons between other MFIF methods and our method on the Lytro dataset.

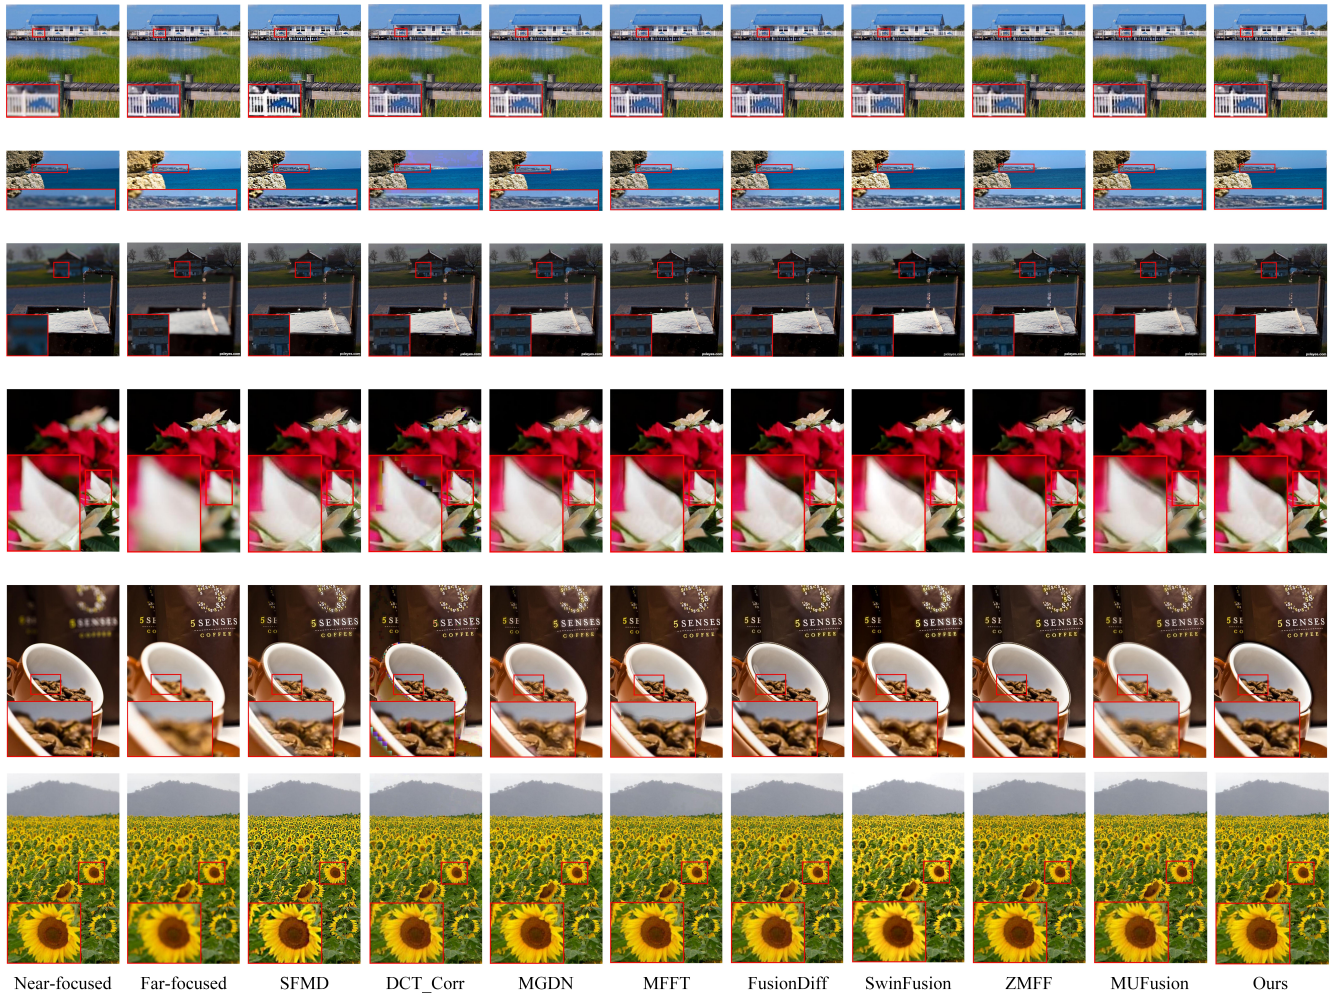

**Figure 2: The visual comparisons between other MFIF methods and our method on the MFFW dataset.**
